# Supplementary material for: Prevalence, Tetracycline Resistance and Tet(O) Gene Identification in Pathogenic Campylobacter Strains Isolated from Chickens in Retail Markets of Lima, Peru
Source: MDPI journal article supplement (doi:10.3390/antibiotics11111580), 2022-11-09
Supplement: s1 [file s1]

**Supplementary Table S1.** Results of inhibition zone diameter (mm) and interpretative condition for susceptible (S), intermediate (I), and resistant (R) in pathogenic *Campylobacter* isolated from chicken meat in supermarkets in Lima, Peru.

|    | Code<br>Sample* | Inhibition zone diameter (mm) |                             | Resistance(R) $\leq$ 22 mm<br>/ Intermediate (I) 23-<br>25 mm /Susceptible<br>(S) $\geq$ 26 mm** |
|----|-----------------|-------------------------------|-----------------------------|--------------------------------------------------------------------------------------------------|
|    |                 | Tetracycline<br>(30 $\mu$ g)  | Doxycycline<br>(30 $\mu$ g) |                                                                                                  |
| 1  | sf11            | 0                             | 0                           | R                                                                                                |
| 2  | sf12            | 0                             | 0                           | R                                                                                                |
| 3  | sf13            | 0                             | 0                           | R                                                                                                |
| 4  | sf14            | 0                             | 0                           | R                                                                                                |
| 5  | sf15            | 0                             | 0                           | R                                                                                                |
| 6  | sf16            | 0                             | 0                           | R                                                                                                |
| 7  | sf17            | 0                             | 0                           | R                                                                                                |
| 8  | sf18            | 0                             | 0                           | R                                                                                                |
| 9  | sf19            | 0                             | 0                           | R                                                                                                |
| 10 | sf21            | 0                             | 0                           | R                                                                                                |
| 11 | sf22            | 0                             | 0                           | R                                                                                                |
| 12 | sf23            | 0                             | 0                           | R                                                                                                |
| 13 | sf24            | 12                            | 12                          | R                                                                                                |
| 14 | sf25            | 0                             | 0                           | R                                                                                                |
| 15 | sf26            | 0                             | 0                           | R                                                                                                |
| 16 | sf27            | 0                             | 0                           | R                                                                                                |
| 17 | sf29            | 0                             | 0                           | R                                                                                                |
| 18 | sf30            | 0                             | 0                           | R                                                                                                |
| 19 | sf31            | 12                            | 12                          | R                                                                                                |
| 20 | sf32            | 12                            | 12                          | R                                                                                                |
| 21 | sf34            | 12                            | 12                          | R                                                                                                |
| 22 | sf35            | 10                            | 10                          | R                                                                                                |
| 23 | sf36            | 12                            | 12                          | R                                                                                                |
| 24 | sf37            | 12                            | 12                          | R                                                                                                |
| 25 | sf38            | 10                            | 10                          | R                                                                                                |
| 26 | sf41            | 10                            | 10                          | R                                                                                                |
| 27 | sf45            | 12                            | 14                          | R                                                                                                |
| 28 | R2              | 0                             | 0                           | R                                                                                                |
| 29 | R3              | 0                             | 0                           | R                                                                                                |
| 30 | R5              | 0                             | 0                           | R                                                                                                |
| 31 | R6              | 12                            | 12                          | R                                                                                                |
| 32 | R9              | 12                            | 12                          | R                                                                                                |
| 33 | R11             | 0                             | 0                           | R                                                                                                |
| 34 | R12             | 0                             | 0                           | R                                                                                                |
| 35 | R17             | 0                             | 0                           | R                                                                                                |
| 36 | R20             | 0                             | 0                           | R                                                                                                |
| 37 | R23             | 12                            | 12                          | R                                                                                                |

|    |      |    |    |   |
|----|------|----|----|---|
| 38 | R24  | 0  | 0  | R |
| 39 | R25  | 12 | 12 | R |
| 40 | R26  | 0  | 0  | R |
| 41 | R27  | 0  | 0  | R |
| 42 | R28  | 12 | 12 | R |
| 43 | R30  | 0  | 0  | R |
| 44 | R31  | 0  | 0  | R |
| 45 | R32  | 12 | 12 | R |
| 46 | R33  | 0  | 0  | R |
| 47 | R35  | 0  | 0  | R |
| 48 | R38  | 12 | 12 | R |
| 49 | R39  | 0  | 0  | R |
| 50 | PV 5 | 0  | 0  | R |
| 51 | PV6  | 0  | 0  | R |

\* Code: sf (Supermarket located in the district of Santiago de Surco); R (Supermarket located in the district of Surquillo); PV (Supermarket located in the district of San Borja).

\*\* According to CLSI [56]

56. CLSI. M-45: Methods for Antimicrobial Dilution and Disk Susceptibility Testing of Infrequently Isolated or Fastidious Bacteria. Clinical and Laboratory Standards Institute **2015**

**Supplementary Table S2.** Results of inhibition zone diameter (mm) and interpretative condition for susceptible (S), intermediate (I), and resistant (R) in pathogenic *Campylobacter* isolated from chicken skin in traditional markets in Lima, Peru.

|    | Code<br>Sample* | Inhibition zone diameter (mm) |                             | Resistance (R) $\leq$ 22 mm<br>/ Intermediate (I) 23-25<br>mm /Susceptible (S) $\geq$<br>26 mm ** |
|----|-----------------|-------------------------------|-----------------------------|---------------------------------------------------------------------------------------------------|
|    |                 | Tetracycline<br>(30 $\mu$ g)  | Doxycycline<br>(30 $\mu$ g) |                                                                                                   |
| 1  | SMP1            | 8                             | 10                          | R                                                                                                 |
| 2  | SMP2            | 8                             | 10                          | R                                                                                                 |
| 3  | SMP3            | 10                            | 14                          | R                                                                                                 |
| 4  | SMP4            | 10                            | 12                          | R                                                                                                 |
| 5  | SMP5            | 12                            | 12                          | R                                                                                                 |
| 6  | SMP7            | NH                            | NH                          | R                                                                                                 |
| 7  | SMP8            | NH                            | NH                          | R                                                                                                 |
| 8  | SMP9            | NH                            | NH                          | R                                                                                                 |
| 9  | SMP10           | NH                            | NH                          | R                                                                                                 |
| 10 | SMP11           | NH                            | NH                          | R                                                                                                 |
| 11 | SMP14           | NH                            | NH                          | R                                                                                                 |
| 12 | SMP15           | NH                            | NH                          | R                                                                                                 |
| 13 | SMP16           | 8                             | 10                          | R                                                                                                 |
| 14 | SMP17           | 8                             | 10                          | R                                                                                                 |
| 15 | SMP18           | 10                            | 10                          | R                                                                                                 |
| 16 | SMP19           | 8                             | 10                          | R                                                                                                 |
| 17 | SMP20           | 8                             | 10                          | R                                                                                                 |
| 18 | SMP21           | 8                             | 10                          | R                                                                                                 |
| 19 | SMP22           | 8                             | 10                          | R                                                                                                 |
| 20 | SMP23           | 12                            | 12                          | R                                                                                                 |
| 21 | SMP24           | 12                            | 12                          | R                                                                                                 |
| 22 | SMP25           | 12                            | 12                          | R                                                                                                 |
| 23 | SMP26           | 10                            | 10                          | R                                                                                                 |
| 24 | SMP27           | 10                            | 10                          | R                                                                                                 |
| 25 | SMP28           | 10                            | 10                          | R                                                                                                 |
| 26 | SMP29           | 10                            | 10                          | R                                                                                                 |
| 27 | SMP30           | 12                            | 12                          | R                                                                                                 |
| 28 | I1              | 12                            | 12                          | R                                                                                                 |
| 29 | I2              | 9                             | 11                          | R                                                                                                 |
| 30 | I3              | 10                            | 10                          | R                                                                                                 |
| 31 | I4              | 10                            | 10                          | R                                                                                                 |
| 32 | I5              | 9                             | 10                          | R                                                                                                 |
| 33 | I6              | 10                            | 10                          | R                                                                                                 |
| 34 | I7              | 8                             | 10                          | R                                                                                                 |
| 35 | I8              | 12                            | 12                          | R                                                                                                 |
| 36 | I9              | 9                             | 10                          | R                                                                                                 |
| 37 | I10             | 9                             | 12                          | R                                                                                                 |

---

|    |     |    |    |   |
|----|-----|----|----|---|
| 38 | I11 | 8  | 10 | R |
| 39 | I12 | 10 | 10 | R |
| 40 | I13 | 10 | 10 | R |
| 41 | I14 | 8  | 10 | R |
| 42 | I15 | 8  | 10 | R |
| 43 | I16 | 8  | 10 | R |
| 44 | I17 | 8  | 10 | R |
| 45 | I18 | 8  | 10 | R |
| 46 | I19 | 8  | 10 | R |
| 47 | I20 | 8  | 10 | R |
| 48 | I21 | 10 | 10 | R |
| 49 | I22 | 8  | 10 | R |
| 50 | I23 | 8  | 10 | R |
| 51 | I24 | 8  | 10 | R |
| 52 | I25 | 8  | 10 | R |
| 53 | I26 | 8  | 10 | R |
| 54 | I27 | 8  | 10 | R |
| 55 | I28 | 8  | 10 | R |
| 56 | I29 | 8  | 10 | R |
| 57 | I30 | 10 | 10 | R |
| 58 | I31 | 8  | 10 | R |
| 59 | I32 | 10 | 10 | R |
| 60 | I33 | 8  | 10 | R |
| 61 | I34 | 8  | 10 | R |
| 62 | I35 | 8  | 10 | R |
| 63 | I36 | 8  | 10 | R |
| 64 | I37 | 8  | 10 | R |
| 65 | I38 | 8  | 10 | R |
| 66 | I39 | 10 | 10 | R |
| 67 | I40 | 8  | 10 | R |
| 68 | I41 | 11 | 12 | R |
| 69 | I42 | 8  | 10 | R |
| 70 | I43 | 10 | 10 | R |
| 71 | I44 | 11 | 11 | R |
| 72 | I45 | 8  | 10 | R |
| 73 | I46 | 9  | 12 | R |
| 74 | I47 | 10 | 10 | R |
| 75 | I48 | 10 | 10 | R |
| 76 | I49 | 8  | 10 | R |
| 77 | I50 | 10 | 10 | R |
| 78 | I51 | 8  | 10 | R |
| 79 | I52 | 8  | 10 | R |
| 80 | I53 | 8  | 10 | R |
| 81 | I54 | 8  | 10 | R |
| 82 | I55 | 8  | 10 | R |

---

|     |      |   |    |   |
|-----|------|---|----|---|
| 83  | I56  | 8 | 10 | R |
| 84  | I57  | 8 | 10 | R |
| 85  | I58  | 8 | 10 | R |
| 86  | I59  | 8 | 10 | R |
| 87  | I60  | 8 | 10 | R |
| 88  | I61  | 8 | 10 | R |
| 89  | I62  | 8 | 10 | R |
| 90  | I63  | 8 | 10 | R |
| 91  | I64  | 8 | 10 | R |
| 92  | I65  | 8 | 10 | R |
| 93  | I66  | 8 | 10 | R |
| 94  | I67  | 8 | 10 | R |
| 95  | I68  | 8 | 10 | R |
| 96  | I69  | 8 | 10 | R |
| 97  | I70  | 8 | 10 | R |
| 98  | SA1  | 8 | 10 | R |
| 99  | SA2  | 8 | 10 | R |
| 100 | SA3  | 8 | 10 | R |
| 101 | SA4  | 8 | 10 | R |
| 102 | SA5  | 8 | 10 | R |
| 103 | SA6  | 8 | 10 | R |
| 104 | SA7  | 8 | 10 | R |
| 105 | SA8  | 8 | 12 | R |
| 106 | SA9  | 8 | 10 | R |
| 107 | SA10 | 8 | 10 | R |
| 108 | SA11 | 8 | 10 | R |
| 109 | SA12 | 8 | 10 | R |
| 110 | SA13 | 8 | 10 | R |
| 111 | SA14 | 8 | 10 | R |
| 112 | SA15 | 8 | 10 | R |
| 113 | SA16 | 8 | 10 | R |
| 114 | SA17 | 8 | 10 | R |
| 115 | SA18 | 8 | 10 | R |
| 116 | SA19 | 8 | 10 | R |
| 117 | SA20 | 8 | 10 | R |

\* Code: SM (Traditional market located in the district of San Martín); I (Traditional market located in the district of Independencia); SA (Traditional market located in the district of Santa Anita)

\*\* According to CLSI [56]

56. CLSI. M-45: Methods for Antimicrobial Dilution and Disk Susceptibility Testing of Infrequently Isolated or Fastidious Bacteria. Clinical and Laboratory Standards Institute **2015**

**Table S3.** Primers used in the identification of *Campylobacter* species and the tetracycline resistance gene Tet(O).

|                             | Gene    | Sequence                  | Product (bp) | Reference                 | PCR conditions                                                                                           |
|-----------------------------|---------|---------------------------|--------------|---------------------------|----------------------------------------------------------------------------------------------------------|
| <i>Campylobacter jejuni</i> | hipO F  | GAA GAG GGT TTG GGT G     | 735          | Linton et al., 1997 [55]  | 10 min at 95 °C; 40 cycles of 1 min at 94 °C; 1 min at 56 °C; 2 min at 72 °C; 10 min at 72 °C; ∞ at 4 °C |
|                             | hipO R  | AGCTAGCTTCGCATAATAACTTG   |              |                           |                                                                                                          |
| <i>Campylobacter coli</i>   | Gly-A F | CATATTGTAAAACCAAAGCTTATCG | 133          | Hungaro et al., 2015 [57] | 5 min at 95 °C; 40 cycles for 1 min at 94°C, 1 min at 56 °C; 1.2 min at 72°C; 5 min at 72 °C; ∞ at 4 °C  |
|                             | Gly-A R | AGTCCAGCAATGTGTGCAATG     |              |                           |                                                                                                          |
| Tet(O)                      | TetO F  | GCGTTTTGTTTATGTGCG        | 559          | Hungaro et al., 2015 [57] | 5 min at 95 °C; 40 cycles for 1 min at 94°C, 1 min at 56 °C; 1.2 min at 72°C; 5 min at 72 °C; ∞ at 4 °C  |
|                             | TetO R  | ATGGACAACCCGACAGAAG       |              |                           |                                                                                                          |

55. Linton, D.; Lawson, A.J.; Owen, R.J.; Stanley, J. PCR Detection, Identification to Species Level, and Fingerprinting of *Campylobacter* *Jejuni* and *Campylobacter* *Coli* Direct from Diarrheic Samples. *J. Clin. Microbiol.* **1997**, *35*, 2568–2572.
57. Hungaro, H.M.; Mendonça, R.C.S.; Rosa, V.O.; Badaró, A.C.L.; Moreira, M.A.S.; Chaves, J.B.P. Low Contamination of *Campylobacter* Spp. on Chicken Carcasses in Minas Gerais State, Brazil: Molecular Characterization and Antimicrobial Resistance. *Food Control* **2015**, *51*, 15–22.
